# Supplementary material
Source: publisher figshare collection journal article supplement (https://gsajournals.figshare.com/ndownloader/files/21863139)
Supplement: Supplementary file 1 [file 21863139]

## Sheet: Sheet1
Table S8. GWAS results of glutamine family genes
GeneID	Name	Chr	Polymorphic number (MAF > 0.05)	MLM (p < 0.01)a	MLM (p < 0.001)b	Min p-value
GRMZM2G050514	gln6	1	21	1	0	0.00220565
GRMZM2G024104	gln2	1	32	3	1	0.000612638
GRMZM2G036464	gln5	4	26	1	0	0.00967969
GRMZM5G872068	gln4	5	37	2	0	0.00670324
GRMZM2G046601	gln3	9	7	0	0	0.0431625
GRMZM2G098290	gln1	10	31	0	0	0.103154
a Number of markers with p-value < 0.01 in MLM method
b Number of markers with p-value < 0.001 in MLM method
